# Supplementary material
Source: PubMed Central journal article supplement (PMC6910193)
Supplement: djz043_supplementary_data.pdf [file djz043_supplementary_data.pdf]

## SUPPLEMENTARY MATERIALS

### Supplementary Tables

**Supplementary Table 1. Demographic and clinical characteristics of T-ALL cases included in this study\***

| <b>Feature</b>                                                | <b>Discovery GWAS<br/>(n=1191)</b> | <b>Replication<br/>(n=117)</b> |
|---------------------------------------------------------------|------------------------------------|--------------------------------|
| Genetically-defined race/ethnicity <sup>†</sup> , No. (%)     |                                    |                                |
| African                                                       | 157 (13.2)                         | 26 (22.2)                      |
| European                                                      | 699 (58.7)                         | 75 (64.1)                      |
| Hispanic                                                      | 126 (10.6)                         | 9 (7.7)                        |
| Other                                                         | 209 (17.5)                         | 7 (6)                          |
| Gender, No. (%)                                               |                                    |                                |
| Female                                                        | 330 (27.7)                         | 27 (23.1)                      |
| Male                                                          | 861 (72.3)                         | 90 (76.9)                      |
| Median age at diagnosis, y (5th to 95th percentiles in years) | 9.1 (2.3 - 18.3)                   | 8.55 (2.45 - 16.9)             |
| Central nervous system disease status <sup>‡</sup> , No. (%)  |                                    |                                |
| CNS1                                                          | 496 (41.6)                         | 54 (46.2)                      |
| Other                                                         | 695 (59.4)                         | 63 (53.8)                      |

\*The discovery GWAS cases were from the COG AALL0434 and St. Jude Total XVI cohorts; the replication cases included the St. Jude Total XIII A, XIII B and XV cohorts. T-ALL, T-cell acute lymphoblastic leukemia; GWAS, genome-wide association study; CNS, central nervous system.

<sup>†</sup>Race/ethnicity was defined on the basis of genetic ancestry. See details in **Methods**

<sup>‡</sup>The level of leukemia in the central nervous system at diagnosis (CNS status) is classified as CNS1 for no leukemia or other.

Supplementary Table 2. Association results at the *CDKN2A* and *USP7* loci in the discovery GWAS

| SNP         | CHR | Genomic Position<br>(hg19) | REF | ALT | Gene(s)                | European<br>American† |         | African<br>American† |         | All ethnicities‡       |                  |                                            |
|-------------|-----|----------------------------|-----|-----|------------------------|-----------------------|---------|----------------------|---------|------------------------|------------------|--------------------------------------------|
|             |     |                            |     |     |                        | AAF                   |         | AAF                  |         | <i>P</i> ‡             | OR (95% CI)‡     | <i>P</i> <sub>PC<math>\bar{S}</math></sub> |
|             |     |                            |     |     |                        | Case                  | Control | Case                 | Control |                        |                  |                                            |
| rs2027939   | 9   | 21956492                   | G*  | A   | <i>MTAP,CDKN2A-AS1</i> | 0.10                  | 0.14    | 0.04                 | 0.04    | 3.2 x 10 <sup>-7</sup> | 0.67 (0.57-0.78) | 8.2 x 10 <sup>-7</sup>                     |
| rs2188127   | 9   | 21965232                   | C*  | G   | <i>MTAP,CDKN2A-AS1</i> | 0.10                  | 0.13    | 0.03                 | 0.04    | 5.0 x 10 <sup>-8</sup> | 0.65 (0.55-0.76) | 1.3 x 10 <sup>-7</sup>                     |
| rs2518719   | 9   | 21970427                   | A*  | G   | <i>CDKN2A</i>          | 0.10                  | 0.14    | 0.13                 | 0.13    | 7.9 x 10 <sup>-7</sup> | 0.70 (0.61-0.81) | 1.7 x 10 <sup>-6</sup>                     |
| rs3731222   | 9   | 21983914                   | T*  | C   | <i>CDKN2A</i>          | 0.10                  | 0.14    | 0.07                 | 0.06    | 7.3 x 10 <sup>-7</sup> | 0.69 (0.59-0.80) | 1.8 x 10 <sup>-6</sup>                     |
| rs3731203   | 9   | 21987584                   | T*  | C   | <i>CDKN2A</i>          | 0.10                  | 0.14    | 0.08                 | 0.07    | 9.8 x 10 <sup>-7</sup> | 0.69 (0.60-0.80) | 2.3 x 10 <sup>-6</sup>                     |
| rs3731198   | 9   | 21989477                   | T*  | C   | <i>CDKN2A</i>          | 0.10                  | 0.14    | 0.03                 | 0.04    | 6.9 x 10 <sup>-8</sup> | 0.65 (0.56-0.76) | 1.8 x 10 <sup>-7</sup>                     |
| rs2811711   | 9   | 21993964                   | T*  | C   | <i>CDKN2A</i>          | 0.10                  | 0.14    | 0.17                 | 0.16    | 6.4 x 10 <sup>-7</sup> | 0.70 (0.61-0.81) | 1.3 x 10 <sup>-6</sup>                     |
| rs2811713   | 9   | 21999328                   | G*  | A   | <i>CDKN2B-AS1</i>      | 0.33                  | 0.39    | 0.05                 | 0.05    | 7.5 x 10 <sup>-7</sup> | 0.78 (0.71-0.86) | 6.7 x 10 <sup>-6</sup>                     |
| rs113177770 | 16  | 8999356                    | G   | A*  | <i>USP7</i>            | 0.10                  | 0.06    | 0.09                 | 0.05    | 2.5 x 10 <sup>-8</sup> | 1.52 (1.31-1.76) | 2.1 x 10 <sup>-8</sup>                     |
| rs76426500  | 16  | 9000729                    | A   | C*  | <i>USP7</i>            | 0.10                  | 0.06    | 0.03                 | 0.01    | 7.1 x 10 <sup>-7</sup> | 1.49 (1.27-1.74) | 5.2 x 10 <sup>-7</sup>                     |
| rs75172776  | 16  | 9001814                    | A   | G*  | <i>USP7</i>            | 0.10                  | 0.06    | 0.11                 | 0.06    | 1.4 x 10 <sup>-8</sup> | 1.52 (1.32-1.76) | 1.2 x 10 <sup>-8</sup>                     |
| rs79430602  | 16  | 9005924                    | T   | C*  | <i>USP7</i>            | 0.10                  | 0.06    | 0.03                 | 0.01    | 4.8 x 10 <sup>-7</sup> | 1.50 (1.28-1.75) | 3.5 x 10 <sup>-7</sup>                     |
| rs77119485  | 16  | 9006721                    | A   | G*  | <i>USP7</i>            | 0.10                  | 0.06    | 0.03                 | 0.01    | 4.8 x 10 <sup>-7</sup> | 1.50 (1.28-1.75) | 3.5 x 10 <sup>-7</sup>                     |
| rs75219349  | 16  | 9007510                    | T   | C*  | <i>USP7</i>            | 0.10                  | 0.06    | 0.07                 | 0.05    | 3.6 x 10 <sup>-7</sup> | 1.47 (1.27-1.70) | 3.0 x 10 <sup>-7</sup>                     |
| rs45513897  | 16  | 9009286                    | A   | G*  | <i>USP7</i>            | 0.10                  | 0.06    | 0.03                 | 0.01    | 6.3 x 10 <sup>-7</sup> | 1.49 (1.27-1.74) | 4.6 x 10 <sup>-7</sup>                     |
| rs2164506   | 16  | 9013035                    | A   | G*  | <i>USP7</i>            | 0.10                  | 0.06    | 0.06                 | 0.04    | 3.6 x 10 <sup>-7</sup> | 1.48 (1.27-1.72) | 2.7 x 10 <sup>-7</sup>                     |
| rs2126999   | 16  | 9013464                    | T   | C*  | <i>USP7</i>            | 0.10                  | 0.06    | 0.03                 | 0.01    | 6.7 x 10 <sup>-7</sup> | 1.49 (1.27-1.74) | 4.9 x 10 <sup>-7</sup>                     |
| rs2164507   | 16  | 9013696                    | G   | A*  | <i>USP7</i>            | 0.10                  | 0.06    | 0.03                 | 0.01    | 2.2 x 10 <sup>-7</sup> | 1.52 (1.29-1.77) | 1.6 x 10 <sup>-7</sup>                     |
| rs118109545 | 16  | 9014660                    | C   | T*  | <i>USP7</i>            | 0.10                  | 0.06    | 0.03                 | 0.01    | 5.8 x 10 <sup>-7</sup> | 1.49 (1.28-1.75) | 4.3 x 10 <sup>-7</sup>                     |
| rs11075029  | 16  | 9015721                    | T   | C*  | <i>USP7</i>            | 0.10                  | 0.06    | 0.03                 | 0.01    | 5.1 x 10 <sup>-7</sup> | 1.49 (1.28-1.75) | 3.7 x 10 <sup>-7</sup>                     |
| rs11075031  | 16  | 9016532                    | C   | A*  | <i>USP7</i>            | 0.10                  | 0.06    | 0.03                 | 0.01    | 4.4 x 10 <sup>-7</sup> | 1.50 (1.28-1.75) | 3.2 x 10 <sup>-7</sup>                     |
| rs7205293   | 16  | 9019416                    | C   | T*  | <i>USP7</i>            | 0.10                  | 0.06    | 0.03                 | 0.01    | 4.2 x 10 <sup>-7</sup> | 1.50 (1.28-1.76) | 2.9 x 10 <sup>-7</sup>                     |
| rs7202585   | 16  | 9022767                    | C   | T*  | <i>USP7</i>            | 0.10                  | 0.06    | 0.11                 | 0.06    | 1.5 x 10 <sup>-8</sup> | 1.52 (1.32-1.76) | 1.2 x 10 <sup>-8</sup>                     |

|             |    |         |   |    |               |      |      |      |      |                        |                  |                        |
|-------------|----|---------|---|----|---------------|------|------|------|------|------------------------|------------------|------------------------|
| rs16964691  | 16 | 9024282 | G | C* | USP7          | 0.10 | 0.06 | 0.10 | 0.04 | 1.0 x 10 <sup>-8</sup> | 1.54 (1.33-1.78) | 7.8 x 10 <sup>-9</sup> |
| rs4539593   | 16 | 9025252 | T | C* | USP7          | 0.10 | 0.06 | 0.03 | 0.01 | 4.0 x 10 <sup>-7</sup> | 1.50 (1.28-1.76) | 2.7 x 10 <sup>-7</sup> |
| rs77188284  | 16 | 9026099 | C | T* | USP7          | 0.10 | 0.06 | 0.03 | 0.01 | 3.5 x 10 <sup>-7</sup> | 1.50 (1.29-1.76) | 2.4 x 10 <sup>-7</sup> |
| rs117169990 | 16 | 9026656 | A | C* | USP7          | 0.10 | 0.06 | 0.03 | 0.01 | 3.5 x 10 <sup>-7</sup> | 1.50 (1.29-1.76) | 2.4 x 10 <sup>-7</sup> |
| rs143625911 | 16 | 9029260 | G | T* | USP7          | 0.10 | 0.06 | 0.03 | 0.01 | 3.1 x 10 <sup>-7</sup> | 1.51 (1.29-1.77) | 2.1 x 10 <sup>-7</sup> |
| rs74916209  | 16 | 9029799 | A | T* | USP7          | 0.10 | 0.06 | 0.03 | 0.01 | 3.5 x 10 <sup>-7</sup> | 1.51 (1.29-1.76) | 2.4 x 10 <sup>-7</sup> |
| rs117697595 | 16 | 9032229 | T | C* | USP7          | 0.10 | 0.06 | 0.03 | 0.01 | 3.7 x 10 <sup>-7</sup> | 1.50 (1.29-1.76) | 2.6 x 10 <sup>-7</sup> |
| rs139012432 | 16 | 9033796 | A | T* | USP7          | 0.10 | 0.06 | 0.03 | 0.01 | 4.9 x 10 <sup>-7</sup> | 1.50 (1.28-1.75) | 3.4 x 10 <sup>-7</sup> |
| rs141361914 | 16 | 9035467 | C | T* | USP7          | 0.10 | 0.06 | 0.03 | 0.01 | 2.1 x 10 <sup>-7</sup> | 1.52 (1.30-1.77) | 1.4 x 10 <sup>-7</sup> |
| rs118105617 | 16 | 9037407 | C | T* | USP7          | 0.10 | 0.06 | 0.03 | 0.01 | 4.3 x 10 <sup>-7</sup> | 1.50 (1.28-1.76) | 3.0 x 10 <sup>-7</sup> |
| rs78932417  | 16 | 9037472 | C | T* | USP7          | 0.10 | 0.06 | 0.03 | 0.01 | 3.5 x 10 <sup>-7</sup> | 1.51 (1.29-1.76) | 2.5 x 10 <sup>-7</sup> |
| rs77863729  | 16 | 9043185 | A | C* | USP7          | 0.10 | 0.06 | 0.03 | 0.01 | 8.9 x 10 <sup>-7</sup> | 1.48 (1.27-1.74) | 6.8 x 10 <sup>-7</sup> |
| rs75593824  | 16 | 9044676 | T | C* | USP7          | 0.10 | 0.06 | 0.03 | 0.01 | 8.6 x 10 <sup>-7</sup> | 1.48 (1.27-1.74) | 6.5 x 10 <sup>-7</sup> |
| rs960734    | 16 | 9046322 | T | C* | USP7          | 0.10 | 0.06 | 0.03 | 0.01 | 3.9 x 10 <sup>-7</sup> | 1.50 (1.28-1.75) | 3.1 x 10 <sup>-7</sup> |
| rs112493057 | 16 | 9047370 | G | C* | USP7          | 0.10 | 0.06 | 0.03 | 0.01 | 4.2 x 10 <sup>-7</sup> | 1.50 (1.28-1.75) | 3.3 x 10 <sup>-7</sup> |
| rs76682701  | 16 | 9048561 | G | A* | USP7          | 0.10 | 0.06 | 0.04 | 0.02 | 4.4 x 10 <sup>-7</sup> | 1.49 (1.27-1.73) | 3.8 x 10 <sup>-7</sup> |
| rs76161145  | 16 | 9050947 | T | C* | USP7          | 0.10 | 0.06 | 0.03 | 0.01 | 3.4 x 10 <sup>-7</sup> | 1.50 (1.28-1.75) | 2.7 x 10 <sup>-7</sup> |
| rs77809369  | 16 | 9052448 | C | T* | USP7          | 0.10 | 0.06 | 0.03 | 0.01 | 2.4 x 10 <sup>-7</sup> | 1.51 (1.29-1.76) | 1.9 x 10 <sup>-7</sup> |
| rs61426394  | 16 | 9053519 | G | C* | USP7          | 0.10 | 0.07 | 0.25 | 0.19 | 2.8 x 10 <sup>-8</sup> | 1.45 (1.27-1.66) | 3.6 x 10 <sup>-8</sup> |
| rs74010349  | 16 | 9054247 | A | G* | USP7          | 0.10 | 0.07 | 0.25 | 0.19 | 2.5 x 10 <sup>-8</sup> | 1.46 (1.28-1.66) | 3.2 x 10 <sup>-8</sup> |
| rs59591814  | 16 | 9055079 | A | G* | USP7          | 0.10 | 0.07 | 0.25 | 0.19 | 2.6 x 10 <sup>-8</sup> | 1.46 (1.28-1.66) | 3.3 x 10 <sup>-8</sup> |
| rs74010351  | 16 | 9056439 | A | G* | USP7          | 0.10 | 0.07 | 0.26 | 0.19 | 4.5 x 10 <sup>-8</sup> | 1.44 (1.27-1.64) | 7.4 x 10 <sup>-8</sup> |
| rs111792818 | 16 | 9059241 | T | A* | USP7,C16orf72 | 0.10 | 0.07 | 0.25 | 0.19 | 7.2 x 10 <sup>-8</sup> | 1.44 (1.26-1.64) | 1.2 x 10 <sup>-7</sup> |

\*asterisk indicates risk allele for T-ALL. Abbreviations: T-ALL, T-cell acute lymphoblastic leukemia; GWAS, genome-wide association study; CHR, chromosome; REF, reference allele; ALT, alternative allele; AAF, alternative allele frequency; OR, odds ratio associated with alternative allele; CI, confidence interval.

†Ethnicity was defined by single nucleotide polymorphism genotype-based European, African, East Asian, and Native American genetic ancestry (see Methods);

‡P values and odds ratios were estimated by the additive logistic regression test adjusting genetic ancestry, and only SNPs with  $P < 10^{-6}$  were included. All tests were two-sided.

§P.pc indicates association P values estimated with principal components included as covariables. All tests were two-sided.

**Supplementary Table 3. Primer sequences for cloning and site-directed mutagenesis of *USP7* variants**

| Name                          | Sequence (5' to 3')                                           | Target region (hg19)  |
|-------------------------------|---------------------------------------------------------------|-----------------------|
| pGL4.23 miniP-rs113177770-G-F | cctaactggccggtacTTGGACAGAAAAGGATATTGGAGATTCATGG               | chr16:8998957-8999748 |
| pGL4.23 miniP-rs113177770-G-R | ccattatataccctctagtgcttaAGTGAAGAGTGCGTGTAACAGC                |                       |
| pGL4.23 miniP-rs113177770-A-F | GACGGTGTGCTAGGCAAGCAGCGCCT                                    |                       |
| pGL4.23 miniP-rs113177770-A-R | AGGCGCTGCTTGCCTAGCACACCGTC                                    |                       |
| pGL4.23 miniP-rs75172776-A-F  | cctaactggccggtacAACCCCTGTCTCTACTAAAAATACAAAAATTAGCCAG         | chr16:9001522-9002104 |
| pGL4.23 miniP-rs75172776-A-R  | ccattatataccctctagtgcttaCCCACATCTGATTTATTTAGATTTTCCTTCTACCT   |                       |
| pGL4.23 miniP-rs75172776-G-F  | AGACAACAAAATATTGGAAAATCCTGTTTAAACGAATACACTAAAAGTCCC           |                       |
| pGL4.23 miniP-rs75172776-G-R  | GGGACTTTTAGTGTATTCGTTTAAACAGGATTTTCCAATATTTTGTTGTCT           |                       |
| pGL4.23 miniP-rs7202585-C-F   | cctaactggccggtacTGCTTCTGATATGACAACCCCTGAGACA                  | chr16:9022273-9023491 |
| pGL4.23 miniP-rs7202585-C-R   | ccattatataccctctagtgcttaATGCAGCCCCTGGAGT                      |                       |
| pGL4.23 miniP-rs7202585-T-F   | GAGACATGTCATGACTGCAAGTGGAGGGCAG                               |                       |
| pGL4.23 miniP-rs7202585-T-R   | CTGCCCTCCACTTGCAGTCATGACATGTCTC                               |                       |
| pGL4.23 miniP-rs16964691-G-F  | cctaactggccggtacGTACCCAAGAAGTACCAAGCATGGA                     | chr16:9024064-9024513 |
| pGL4.23 miniP-rs16964691-G-R  | ccattatataccctctagtgcttaTGCAGAATATCATTGCAAATAAAGCAAATTATAGTGT |                       |
| pGL4.23 miniP-rs16964691-C-F  | TAAAGAAGAAAAGAAATTCCACGCGTTTTACATTCATGGCTTTAATAG              |                       |
| pGL4.23 miniP-rs16964691-C-R  | CTATTAAAGCCATGAATGTAAAACGCGTGGAATTTCTTTTTCTTCTTTA             |                       |

|                                           |                                                    |                       |
|-------------------------------------------|----------------------------------------------------|-----------------------|
| pGL4.23 miniP-rs61426394/rs74010349-G/A-F | cctaactggccggtacGCTCACATCAGAGTGAGATGCTAGG          | chr16:9053365-9054420 |
| pGL4.23 miniP-rs61426394/rs74010349-G/A-R | ccattatataccctctagtgcttaAACCTGGAGCATCCTGCC         |                       |
| pGL4.23 miniP-rs61426394-C-F              | TCGAATTATTTGACTTTTTGTCTCCTTACAGTGCTATTTGAAAGAATC   |                       |
| pGL4.23 miniP-rs61426394-C-R              | GATTCTTTCAAATAGCACTGTAAGGAGACAAAAGTCAAATAATTCGA    |                       |
| pGL4.23 miniP-rs74010349-G-F              | TCCAGAGCACTGCTGTTTTCCAGTGAATATAACAAGGAC            |                       |
| pGL4.23 miniP-rs74010349-G-R              | GTCCTTGTATATTCCTGGAACAGCAGTGCTCTGG                 |                       |
| pGL4.23 miniP-rs59591814-A/G-F            | cctaactggccggtacGATTAAGTGCCTAGGGGTTACCTTTCTAATACAA | chr16:9054914-9055513 |
| pGL4.23 miniP-rs59591814-A/G-R            | ccattatataccctctagtgcttaTCCCATGACATTGTCCTACCGC     |                       |
| pGL4.23 miniP-rs74010351-A-F              | cctaactggccggtacTTCATTCAGGTGGCCTCCATTTGAC          | chr16:9056073-9056970 |
| pGL4.23 miniP-rs74010351-A-R              | ccattatataccctctagtgcttaTAACCAGGCCCGGGC            |                       |
| pGL4.23 miniP-rs74010351-G-F              | CACCACACACTGCCAGGTACAAACTCCCCGA                    |                       |
| pGL4.23 miniP-rs74010351-G-R              | TCGGGGAGTTTGTACCTGGCAGTGTGTGGTG                    |                       |

---

SUPPLEMENTARY FIGURES

**A**

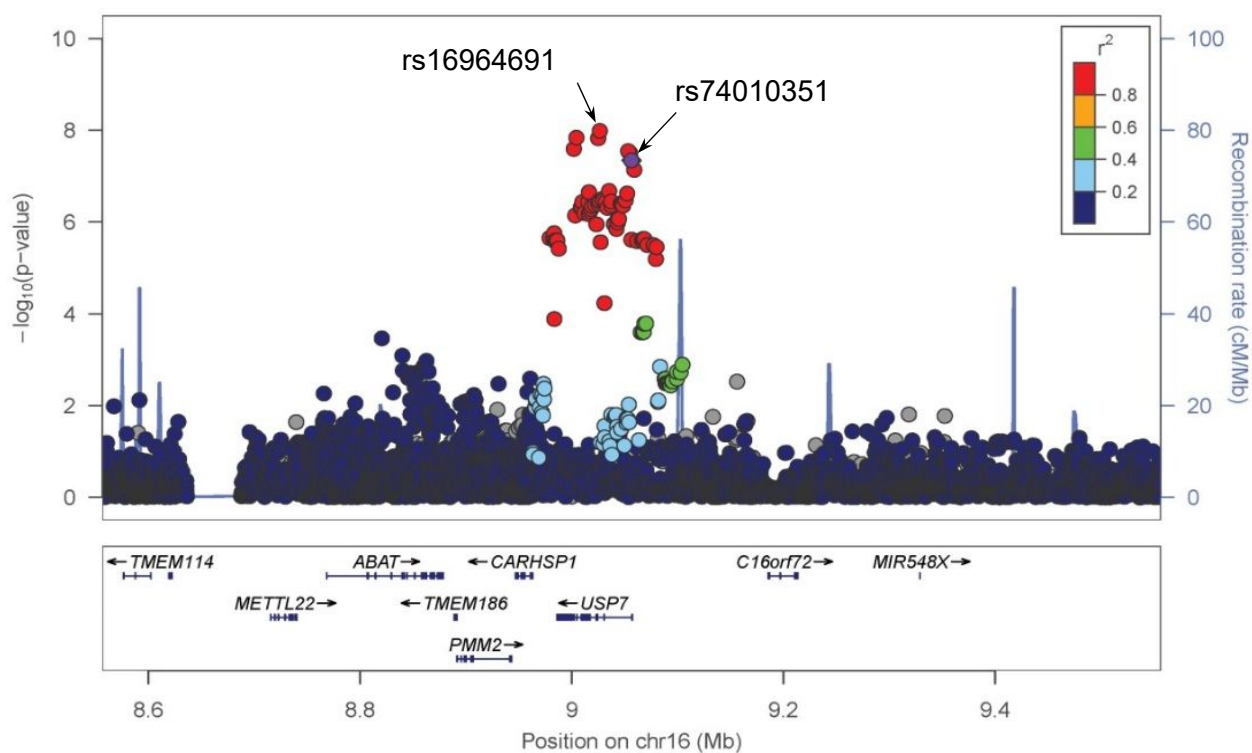

**B**

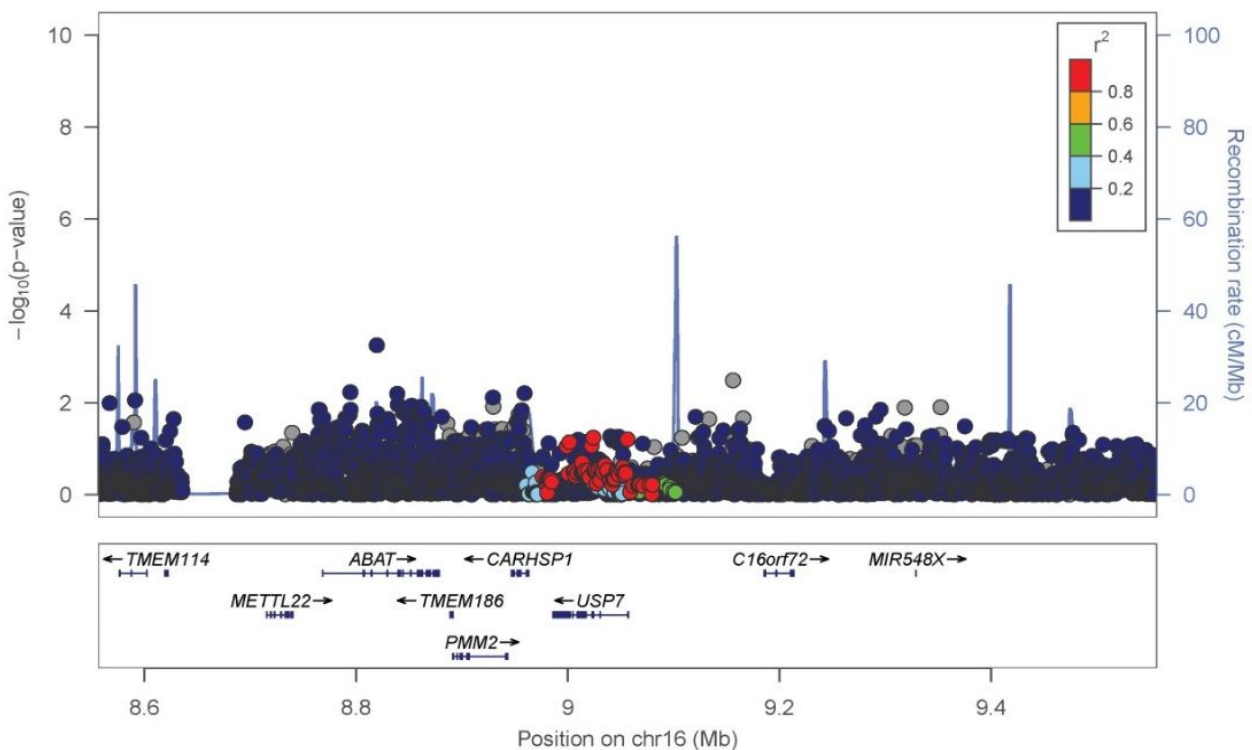

**Supplementary Figure 1. Univariate and conditional association results at the *USP7* locus.** Both directly-genotyped and imputed SNPs were included in the analyses. rs74010351 was the top directly-genotyped variant in the discovery GWAS and shown as a purple diamond (OR = 1.44, 95% CI 1.27-1.65,  $P = 4.51 \times 10^{-8}$ ). All other SNPs are highlighted by color showing their extent of linkage disequilibrium with rs74010351. Recombination rate, genetic position, and the locations (hg19) of nearby genes (RefSeq) are indicated. The top associated SNP from imputation is rs16964691 (OR = 1.54, 95% CI 1.33-1.78,  $P = 1.01 \times 10^{-8}$ ).  $P$  values were calculated by additive logistic regression test in univariate analysis (**A**), or after adjusting for genotype at rs74010351 (conditional analysis, **B**). All statistical tests were two-sided.

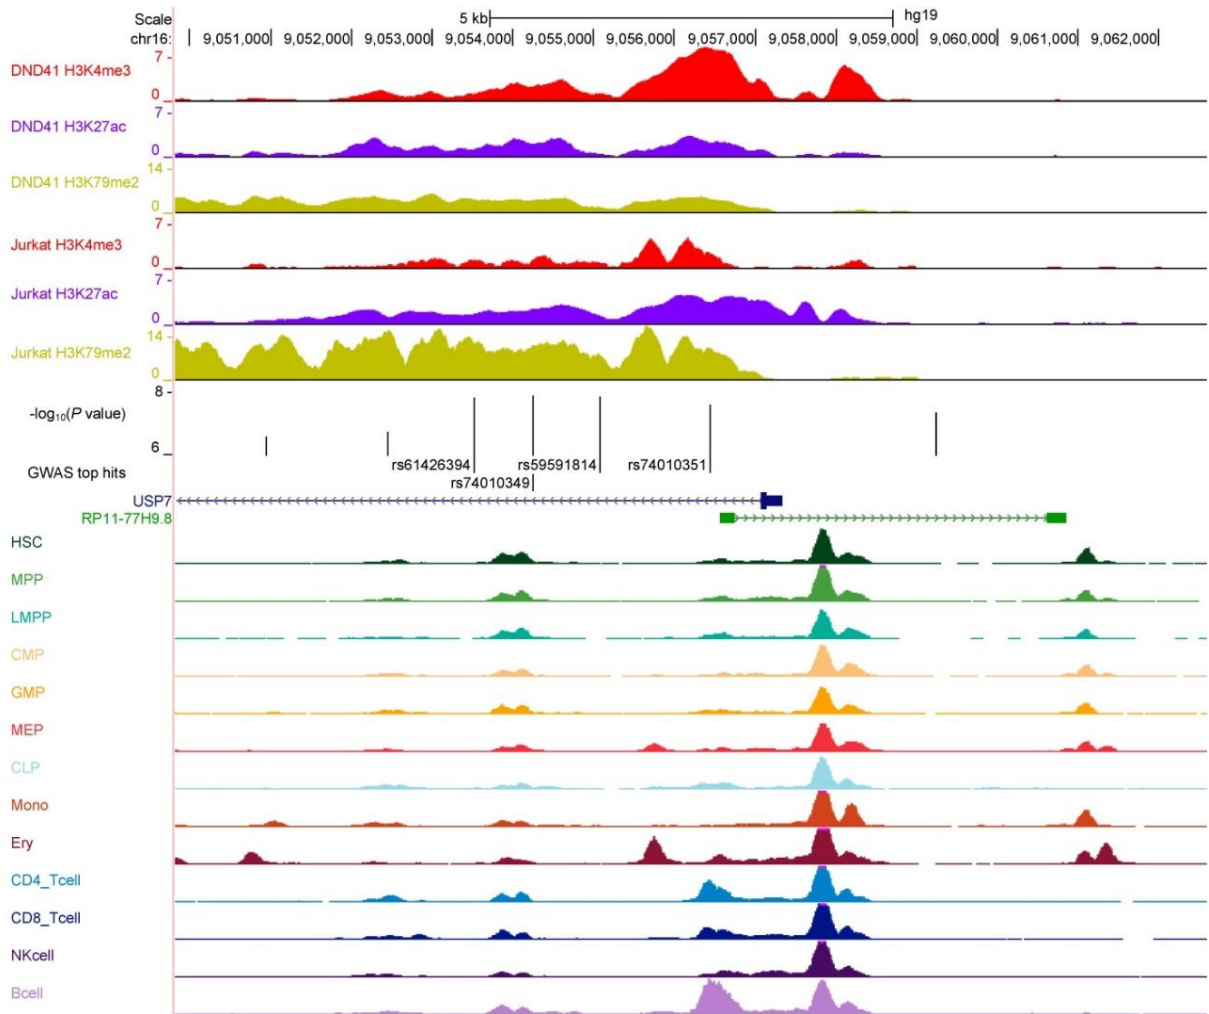

**Supplementary Figure 2. Annotation and visualization of genomic region close to *USP7* promoter.** Genomic positions and scale for the human genome assembly February 2009 (GRCh37/h19) are shown on the top. Genome-wide significant T-ALL risk variants in *USP7* ( $P < 5 \times 10^{-8}$ ) were marked in the middle panel and the log-transformed  $P$  values (for association with T-ALL) were shown in bed graph. The gene structure, ChIP-seq signals for histone modifications (i.e., H3K4me3, H3K27ac and H3K79me2) in T-ALL cell lines (i.e., DND41 and Jurkat) (*Science*. 2014;346(6215):1373-1377), and ATAC-seq signals of hematopoietic cells (*Nat Genet*. 2016;48(10):1193-1203) were also included. T-ALL, T-cell acute lymphoblastic leukemia.



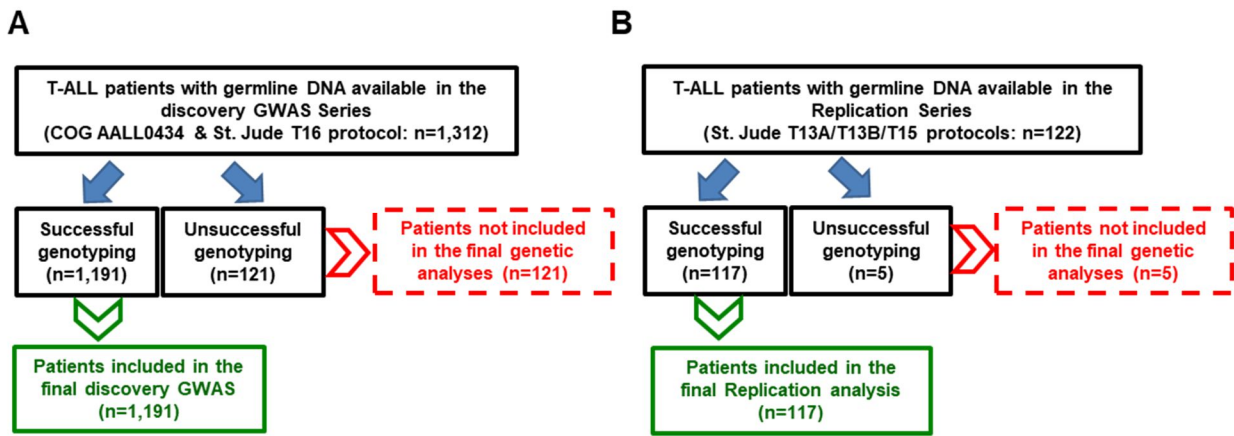

**Supplementary Figure 3. Flow chart of patient inclusion and exclusion for the genomic analyses.** Individuals with one of the following features were excluded: discordant sex (between clinical data and genotype-inferred sex); genotype failure rate >5%; heterozygosity rate  $\geq 5$  s.d. from the mean; heterozygosity rate  $\geq 3$  s.d. from the mean if genotype failure rate  $\geq .03$ ; identity-by-descent score  $> .185$  and lower call rate to other individuals.

**A**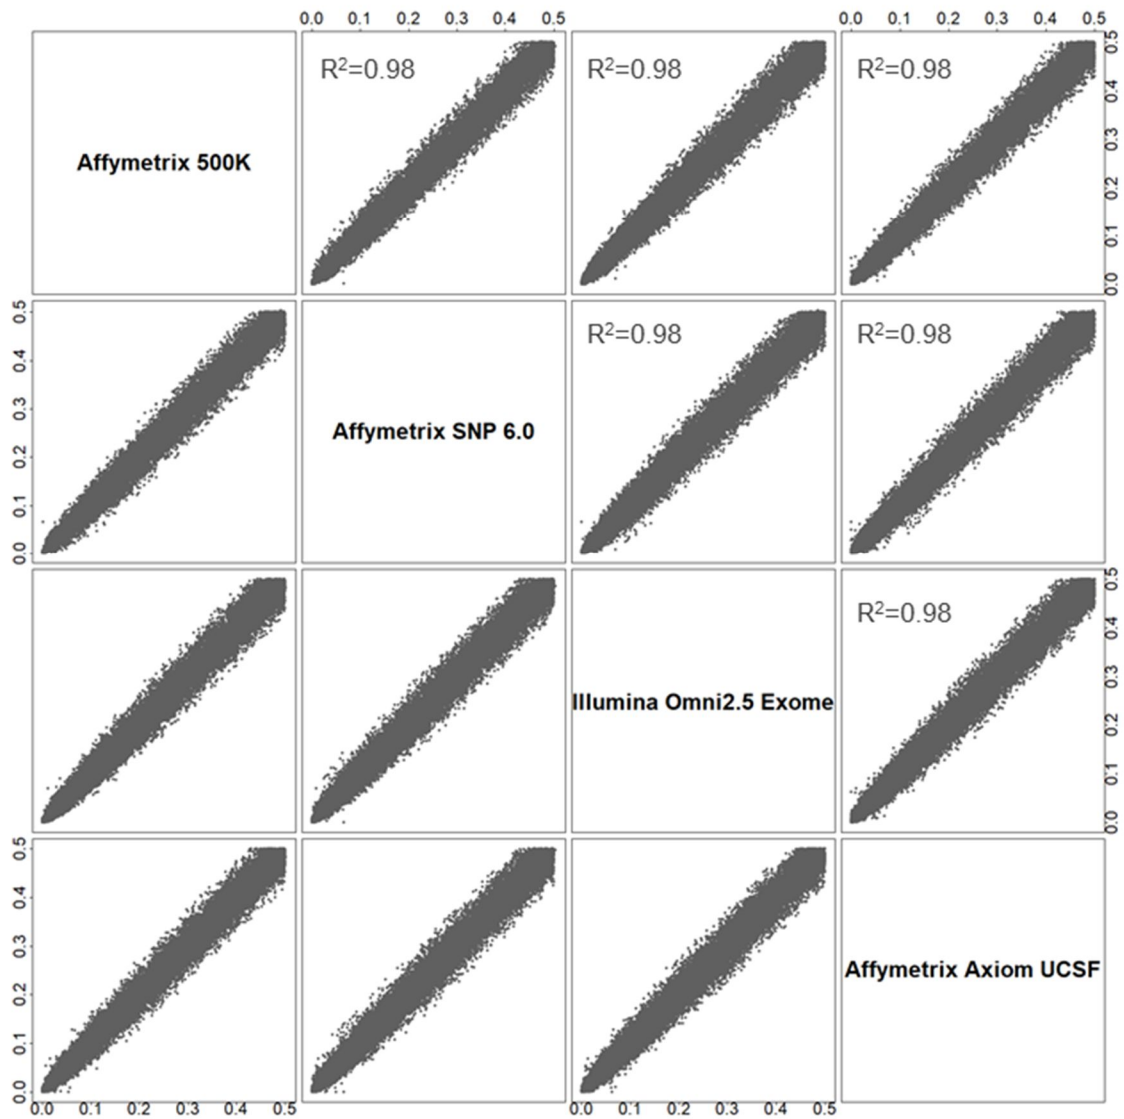**B**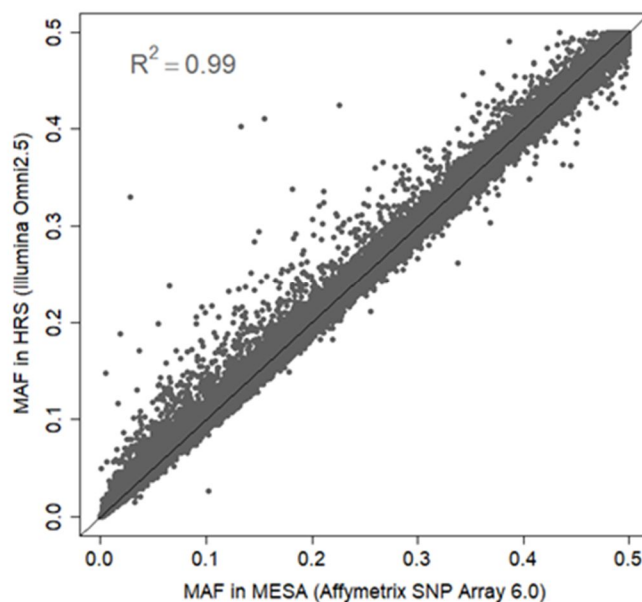

**Supplementary Figure 4. Consistency in genotype imputation across cohorts with different genome-wide SNP arrays.** For each cohort genotyped on a different array, we first randomly selected 30,000 imputed SNPs; the allele frequency for each SNP was calculated in each cohort with a different array platform, and then the correlation coefficient in allele frequency of these 30,000 SNPs between 2 arrays was evaluated. This analysis was performed for all possible array comparisons for cases (**A**) and for controls (**B**), respectively. The R squares of correlation across genotyping platforms were consistently more than 0.98.

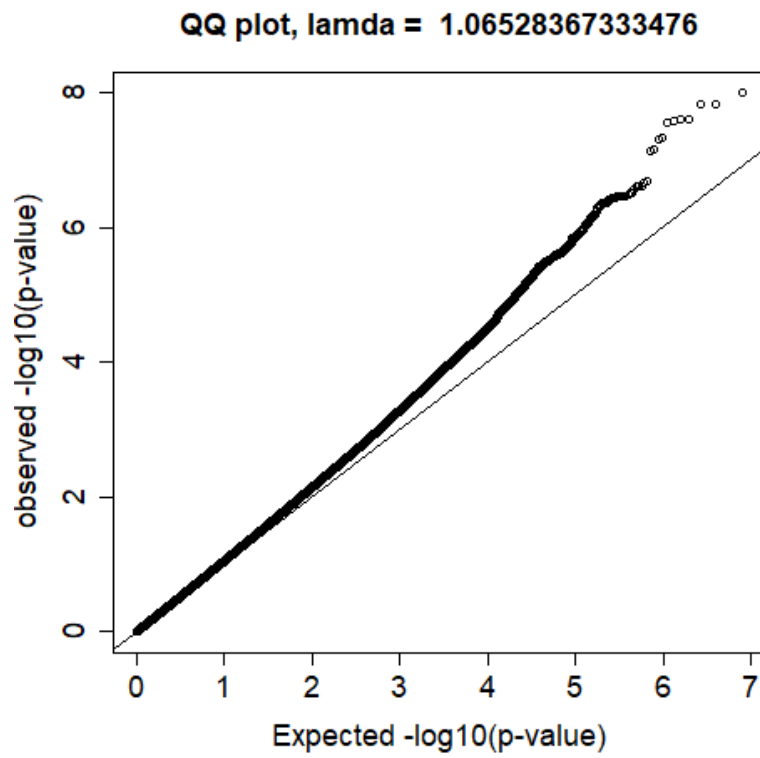

**Supplementary Figure 5. Quantile-quantile (Q-Q) plot of logistic regression test for GWAS.**

The negative logarithm of the observed (y axis) and the expected (x axis)  $P$  value is plotted for each SNP (dot), and the black line indicates the null hypothesis of no true association. Deviation from the expected  $P$  value distribution is evident only in the tail area ( $\lambda=1.07$ ), suggesting that population stratification was adequately controlled by adjusting for genetic ancestry.
